# Supplementary material for: Radiographic Assessment of Sagittal Spinopelvic Alignment and Coccygeal Morphology and Mobility in Sitting and Standing Positions in Coccydynia
Source: Research Square preprint supplement (doi:10.21203/rs.3.rs-8064384/v1), 2025-11-26
Supplement: Supplementary file 1 [file 15328acd5e28310deb7a6d5c.docx]

**Supplementary Table. Stepwise logistic regression analysis of sagittal spinopelvic and coccygeal parameters associated with pain status (NRS > 6).**

| **Variable** | **B** | **SE** | **z** | **p** | **OR (ExpB)** | **95% CI (Lower-Upper)** |
| --- | --- | --- | --- | --- | --- | --- |
| **(Intercept)** | 0.916 | 0.853 | 1.073 | 0.283 | 2.50 | 0.50 - 15.58 |
| **Sacrococcygeal Angle (SCA)** | 0.065 | 0.043 | 1.533 | 0.125 | 1.07 | 0.99 - 1.17 |
| **Intercoccygeal Angle (ICA)** | 0.086 | 0.039 | 2.192 | 0.028 | 1.09 | 1.02 - 1.20 |
| **Thoracal Kyphosis (TK)** | -0.139 | 0.067 | -2.075 | 0.038 | 0.87 | 0.75 - 0.98 |
| **Thoracolumbar Angle (TPA-T1PA)** | -0.075 | 0.039 | -1.934 | 0.053 | 0.93 | 0.85 - 1.00 |
| **Anterior Pelvic Plane Angle (APPA)** | 0.172 | 0.055 | 3.114 | 0.002 | 1.19 | 1.08 - 1.35 |

**Model fit indices:**

- **Omnibus test**: χ² = 35.77 (df = 20), p = 0.018 → indicates the included predictors significantly improved the overall model.
- **Hosmer–Lemeshow test**: χ² = 16.62 (df = 8), p = 0.034 → suggests limited fit between observed and predicted values.
- **Pseudo R²**: McFadden = 0.40, Cox & Snell = 0.43, Nagelkerke = 0.57 → indicates moderate to strong explanatory power.
- **ROC analysis**: AUC = 0.88 (95% CI: 0.78–0.99), p < 0.001 (DeLong test) → shows excellent discrimination.

**Interpretation:**
Increased ICA was associated with a 9% higher odds of pain (p = 0.028). Each unit increase in TK reduced the odds of pain by 13% (p = 0.038). APPA was the strongest predictor, with a 19% increase in the odds of pain for each unit increase (p = 0.002).
